# Supplementary material for: Nanoconfinement-induced high-rate performance of hard carbon for densified sodium cluster storage
Source: Royal Society of Chemistry journal article supplement (doi:10.1039/d5sc09998f), 2026-01-01
Supplement: d5sc09998f1.pdf [file d5sc09998f1.pdf]

## **Electronic Supplementary Information**

### **Nanoconfinement-induced high-rate performance of hard carbon for densified sodium clusters storage**

## Experimental Section

*Material Synthesis* In a typical synthesis process, 2 g of hydroxyl-rich cellulose was ground homogeneously with 10 mg, 20 mg, and 40 mg of carboxyl-rich graphene in mass ratios of 0.5%, 1%, and 2%, respectively, in a mortar and pestle. The sample was then carbonized in a tube furnace under argon atmosphere at a ramp rate of 2 °C per minute at 1300 °C for 2 h. The hard carbon material obtained after carbonization was named HC-G-x (x refers to the percentage of graphene added to cellulose). As a comparison hard carbon (HC) was obtained by carbonizing cellulose under the same conditions, and the obtained hard carbon directly with 1% graphene named as HC@G to verify the graphene orient-induced graphitization.

*Electrode Preparation* The hard carbon material consisted of a mixture of active material, conductive carbon black (KB) and sodium carboxymethyl cellulose (CMC) in the mass ratio of 90:5:5. The mixed slurry was coated on a copper foil and dried under vacuum at 80°C for 12 h. The mass loading of the active material was 2.8-3.2 mg cm<sup>-2</sup>. The electrolyte was 1M NaPF<sub>6</sub> in DME = 100 Vol% and the separator was glass fiber. All electrochemical tests were performed using CR2032 coin cells and assembled in an argon filled glove box (H<sub>2</sub>O < 0.01 ppm, O<sub>2</sub> < 0.01 ppm).

*Materials Characterization:* The crystal structures of samples are characterized by X-ray diffraction pattern (XRD, D/MAX-Ultima, Japan) with a Cu K $\alpha$  radiation source and Raman spectroscopy (Raman, Invia Reflex, England). The morphology and microstructure of samples are characterized by SEM (SEM, Regulus 8100, HITACHI) and high-resolution transmission electron microscopy (HRTEM, JEM-F200, Japan). X-ray photoelectron spectroscopy (XPS, ESCALAB 250, USA) is employed to detect the surface valence states of the samples. N<sub>2</sub> adsorption-desorption tests are conducted with Micromeritics ASAP 2460 (USA), the closed pores are investigated using a small angle X-ray scattering system (SAXS, SAXSpoint 5.0).

*In/ex-situ measurement:* *In-situ* Raman is tested through a customized electrolytic cell device. Na metal is used as the counter and reference electrodes, glass fiber as the separator, and the electrolyte is 1M NaPF<sub>6</sub> in DME = 100 Vol%. The in-situ test cell is cycled between 0.01 and 2.0 V. For full cells, NaNi<sub>1/3</sub>Fe<sub>1/3</sub>Mn<sub>1/3</sub>O<sub>2</sub> was used as the

cathode, consisting of 90 wt.% active material, 5 wt.% carbon black, and 5 wt.% PVDF coated on aluminum foil, with an anode-to-cathode mass ratio of 1:2~3, with an average N/P ratio of ~1.1. 1,2-dimethoxyethane (DME) and EC/DMC (1:1 v/v) were respectively employed as the electrolytes.

### Correlated Calculations

**The  $d_{(002)}$  value:** The average interlayer spacing could be conducted according to Bragg's equation:

$$2d\sin\theta = n\lambda \quad (1)$$

where  $d$  is the average interlayer spacing,  $2\theta$  is the diffraction angle,  $\lambda$  is the wavelength of the incident X-ray excitation beam,  $n$  is the order of reflection.

**Diffusion coefficient of sodium ion ( $D_{Na^+}$ ):** The diffusion coefficient of sodium-ion ( $D_{Na^+}$ ) can be estimated by the Fick's second law equation: [3]

$$D = \frac{4}{\pi\tau} \left( \frac{m_B V_M}{M_B S} \right)^2 \left( \frac{\Delta E S}{\Delta E \tau} \right)^2 \quad (2)$$

in which  $\tau$  represents the pulse duration,  $m_B$  and  $S$  are related with the active mass loading and surface area of the electrode,  $V_M$  and  $M_B$  refer to the molar volume and weight of the active material,  $\Delta E S$  and  $\Delta E \tau$  (refer to voltage variation leaded by galvanostatic charge/discharge and pulse, respectively) can be acquired from the GITT curves.

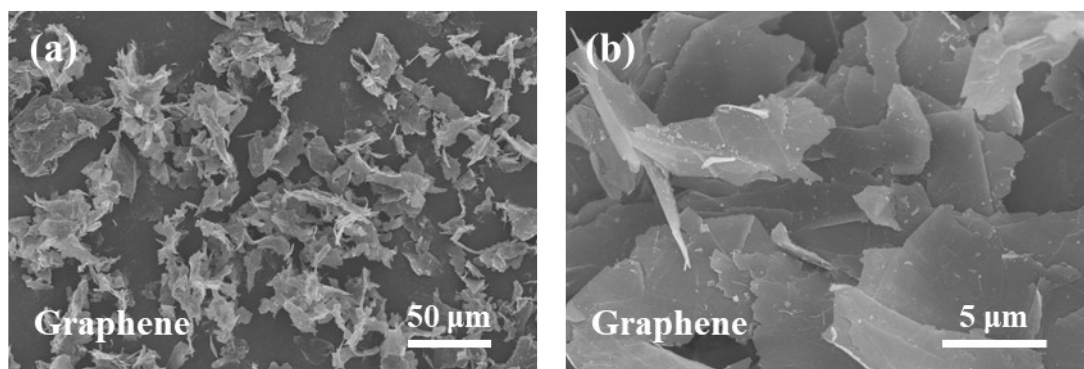

**Figure S1.** (a-b) SEM images of graphene at different magnifications.

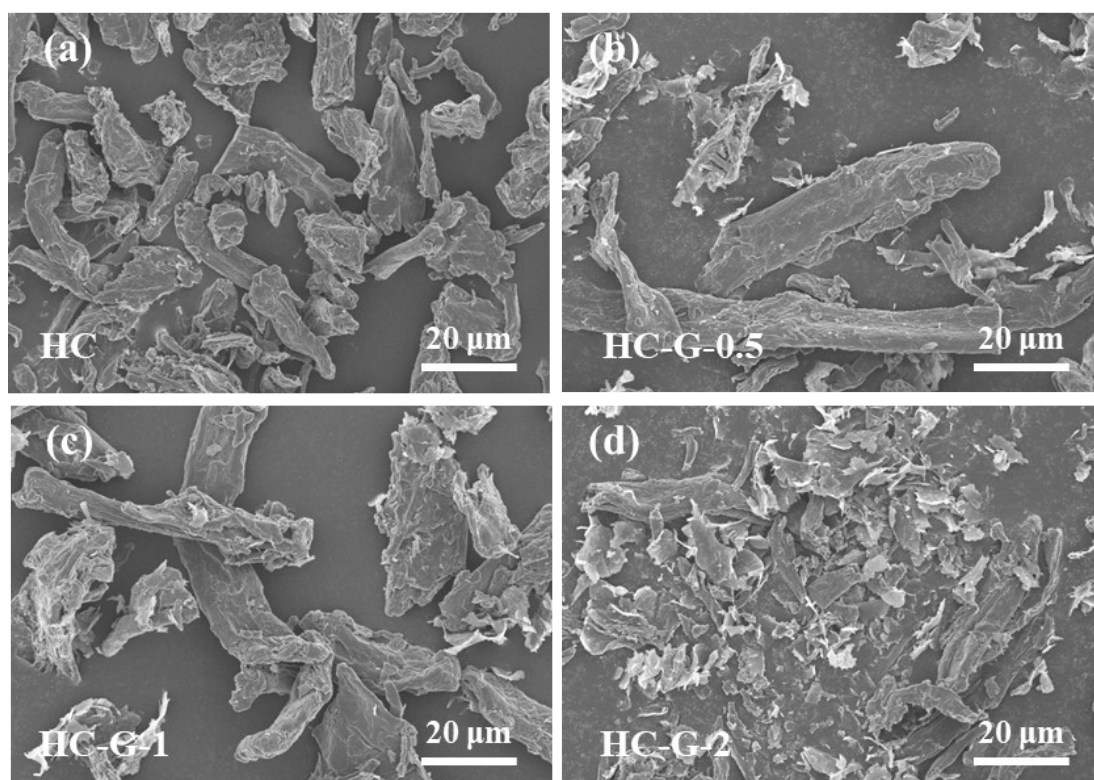

**Figure S2.** SEM images of (a) HC, (b) HC-G-0.5, (c)HC-G-1, and (d) HC-G-2 samples.

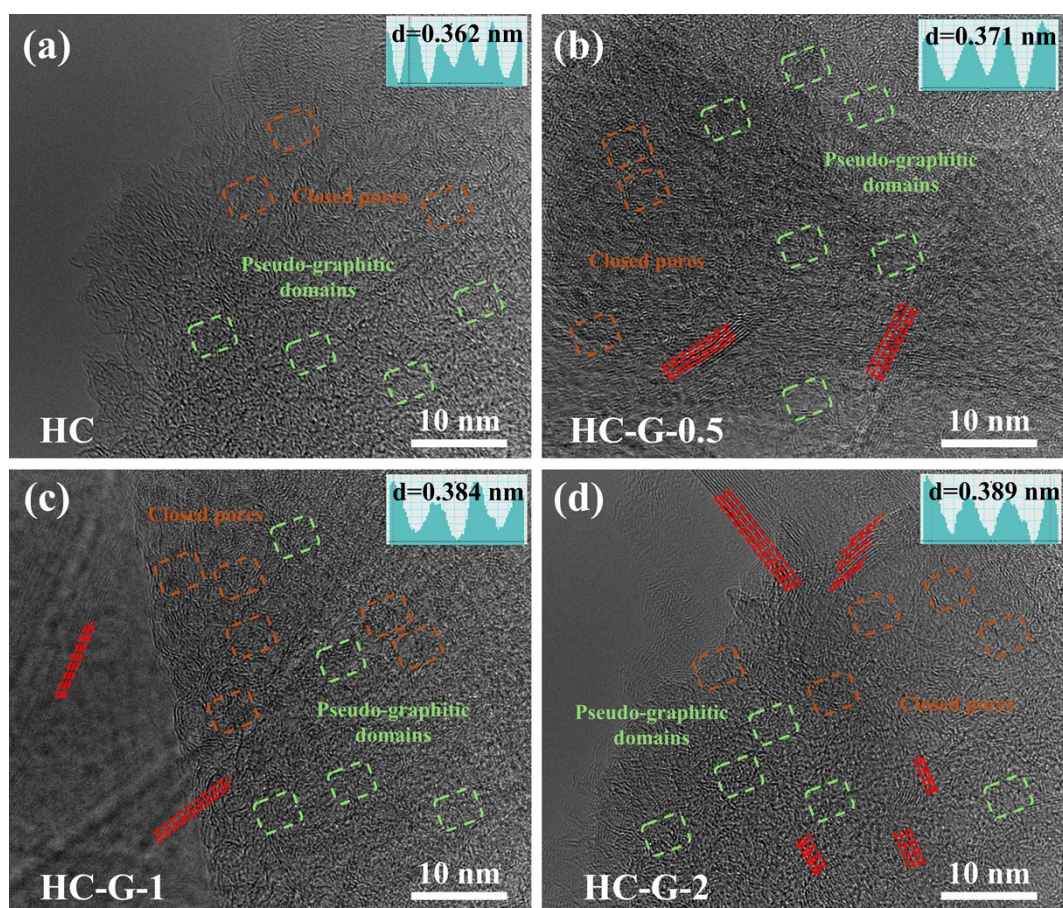

**Figure S3.** HRTEM images of (a) HC, (b) HC-G-0.5, (c) HC-G-1, and (d) HC-G-2 samples with different pseudo-graphitic domain structures.

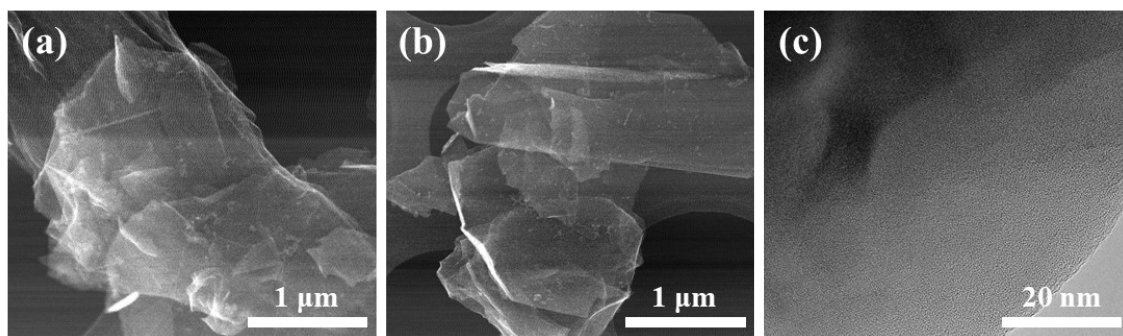

**Figure S4.** (a-c) The HRTEM images of HC@G with different magnifications, and show the obviously stacked structure.

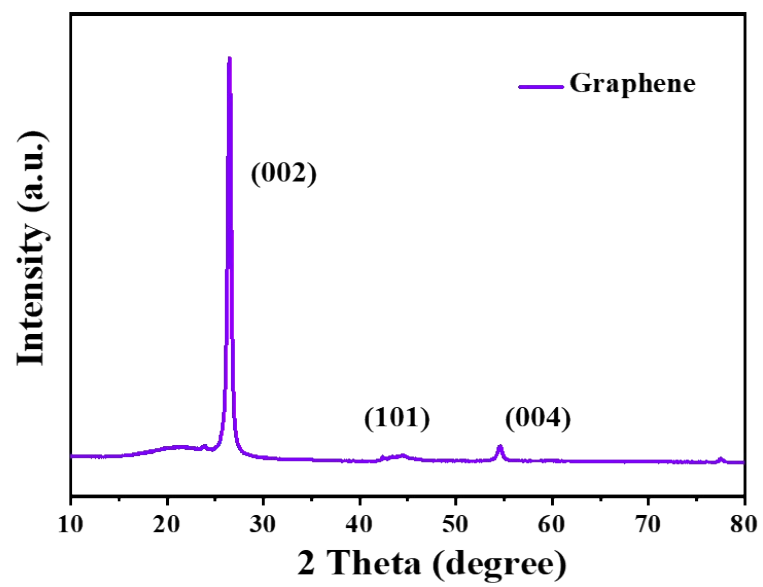

**Figure S5.** XRD pattern of graphene.



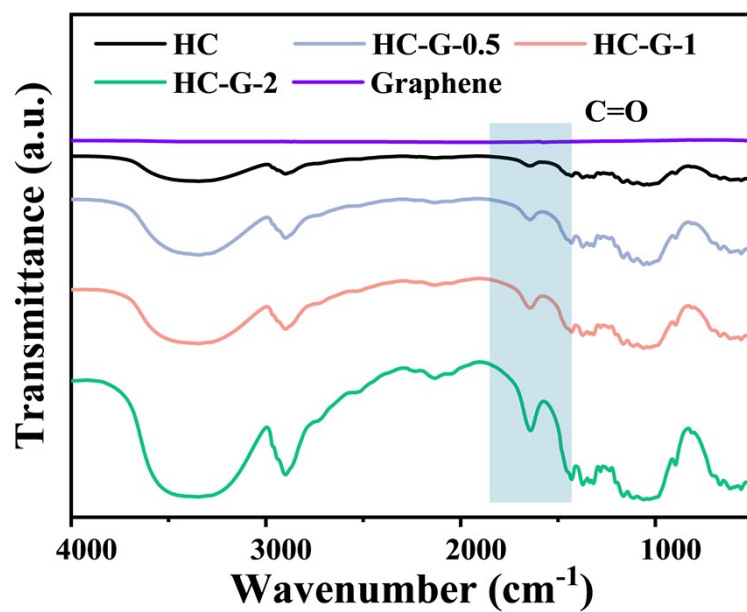

**Figure S6.** Fourier-transform infrared spectroscopy of the hard carbon precursor from the HC, HC-G-0.5, HC-G-1, HC-G-2, and graphene samples.

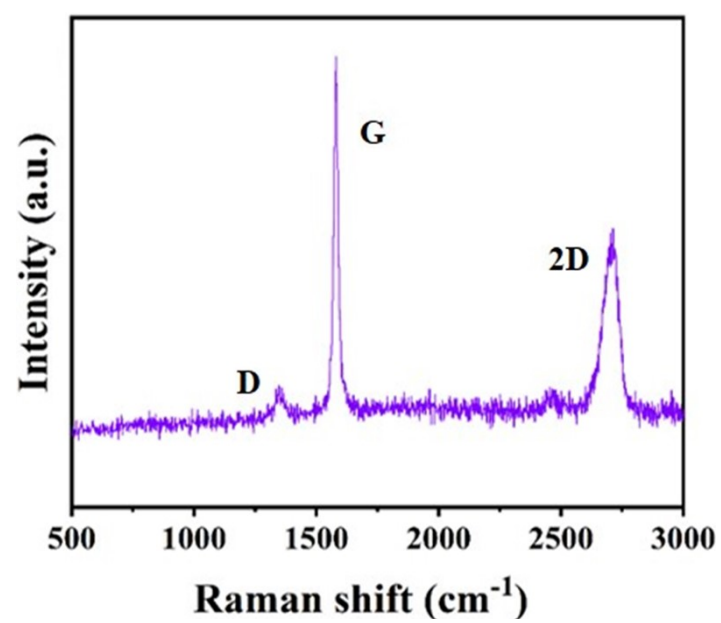

**Figure S7.** Raman spectral image of graphene.

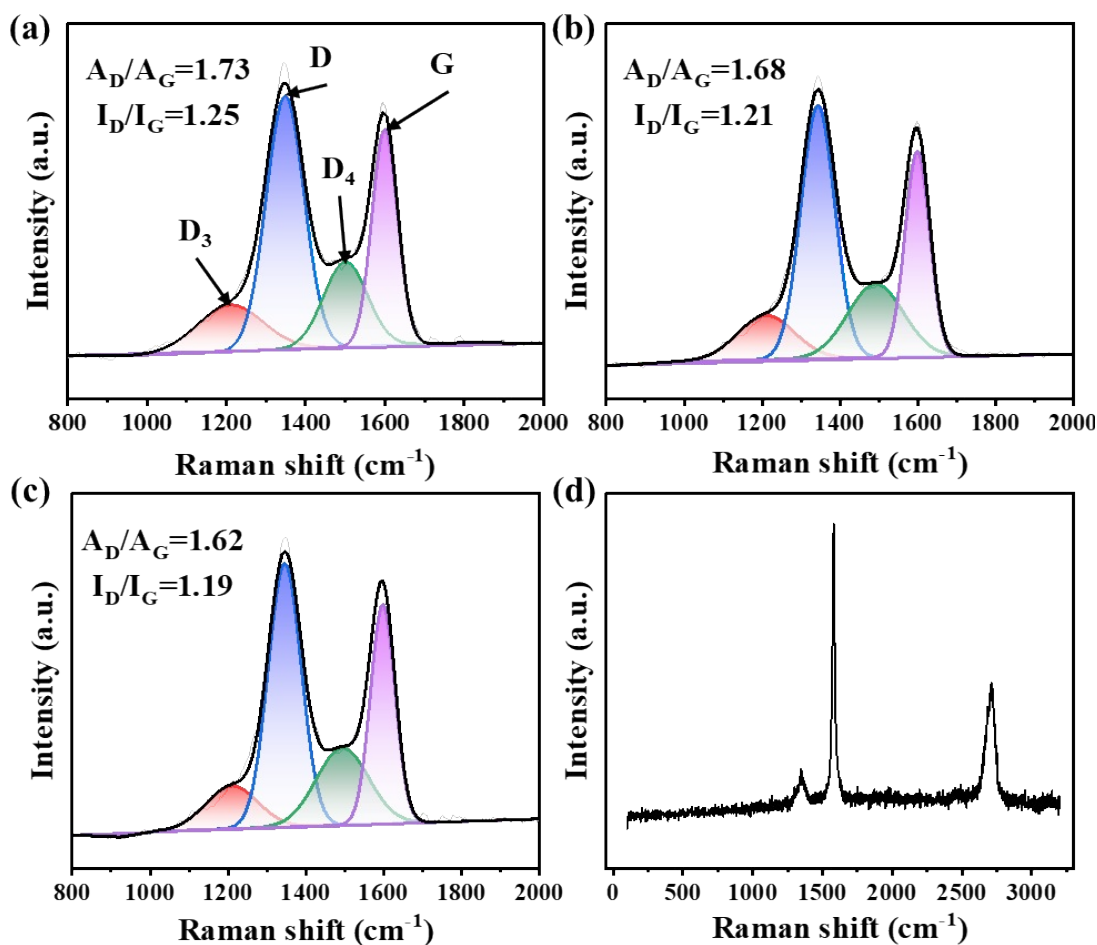

**Figure S8.** Raman spectra of (a) HC, (b) HC-G-0.5, (c) HC-G-1, (d) HC-G-2 samples.

**Text:** Based on the common Raman vibrational modes of carbon materials, HC, HC-G-0.5 and HC-G-1 were fitted to four peaks, the D<sub>3</sub> peaks located around 1190-1210 cm<sup>-1</sup> correspond to sp<sup>2</sup>-sp<sup>3</sup> hybridized structures or C-C/C-O stretching vibrations, the D peak located around 1350 cm<sup>-1</sup> corresponds to a defective sp<sup>2</sup> structure, the D<sub>2</sub> peak located around 1490-1510 cm<sup>-1</sup> corresponds to amorphous short-range sp<sup>3</sup> carbon defects, the G peak located around 1590 cm<sup>-1</sup> corresponds to the ordered sp<sup>2</sup> carbon in graphite.

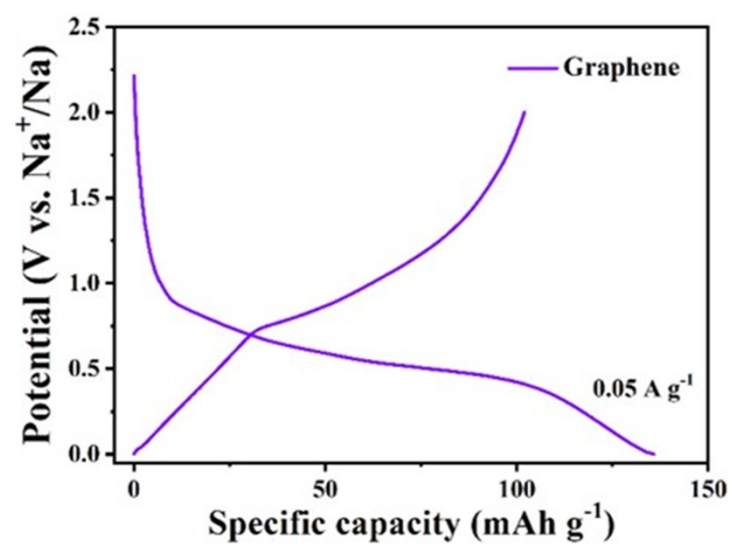

**Figure S9.** Charge-discharge curves of graphene at a current density of 50 mA g<sup>-1</sup>.

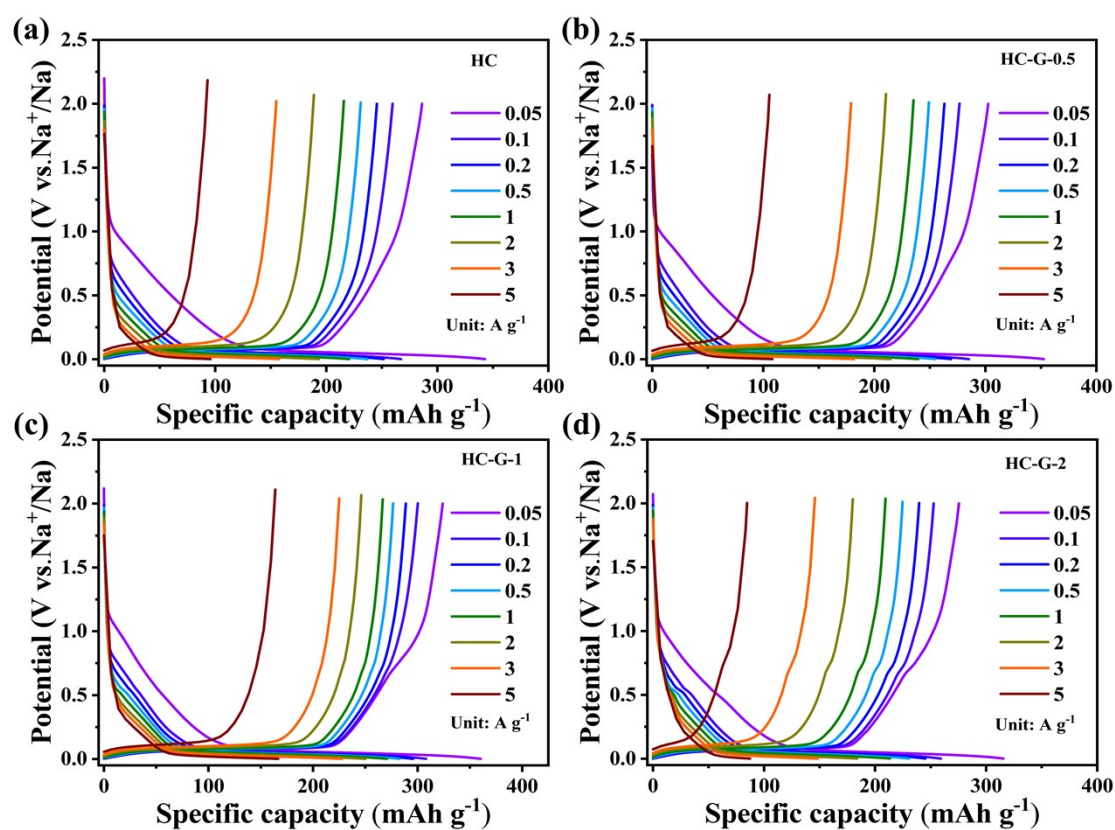

**Figure S10.** Charge-discharge curves of samples at different current densities. (a) HC, (b) HC-G-0.5, (c) HC-G-1 and (d) HC-G-2 electrodes.

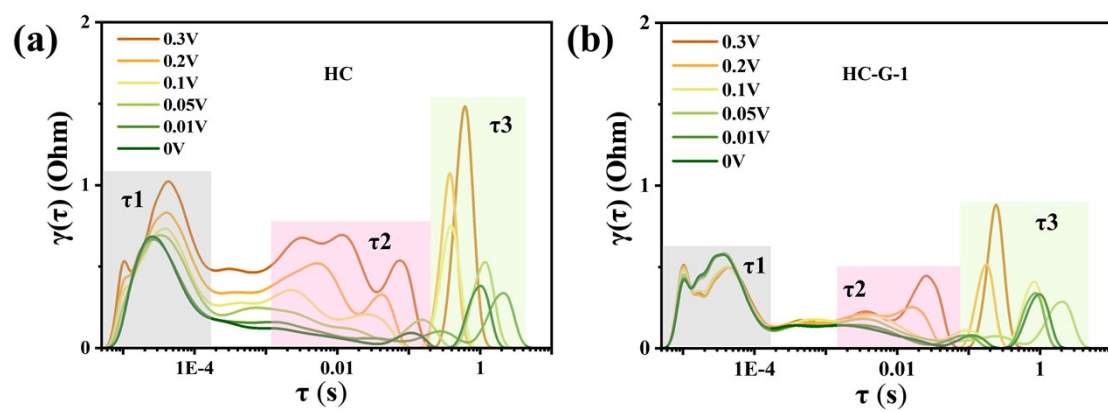

**Figure S11.** The distribution of relaxation time plots ( $\tau_1$ ,  $\tau_2$ ,  $\tau_3$ ) of HC and HC-G-1 electrodes during the discharging process.

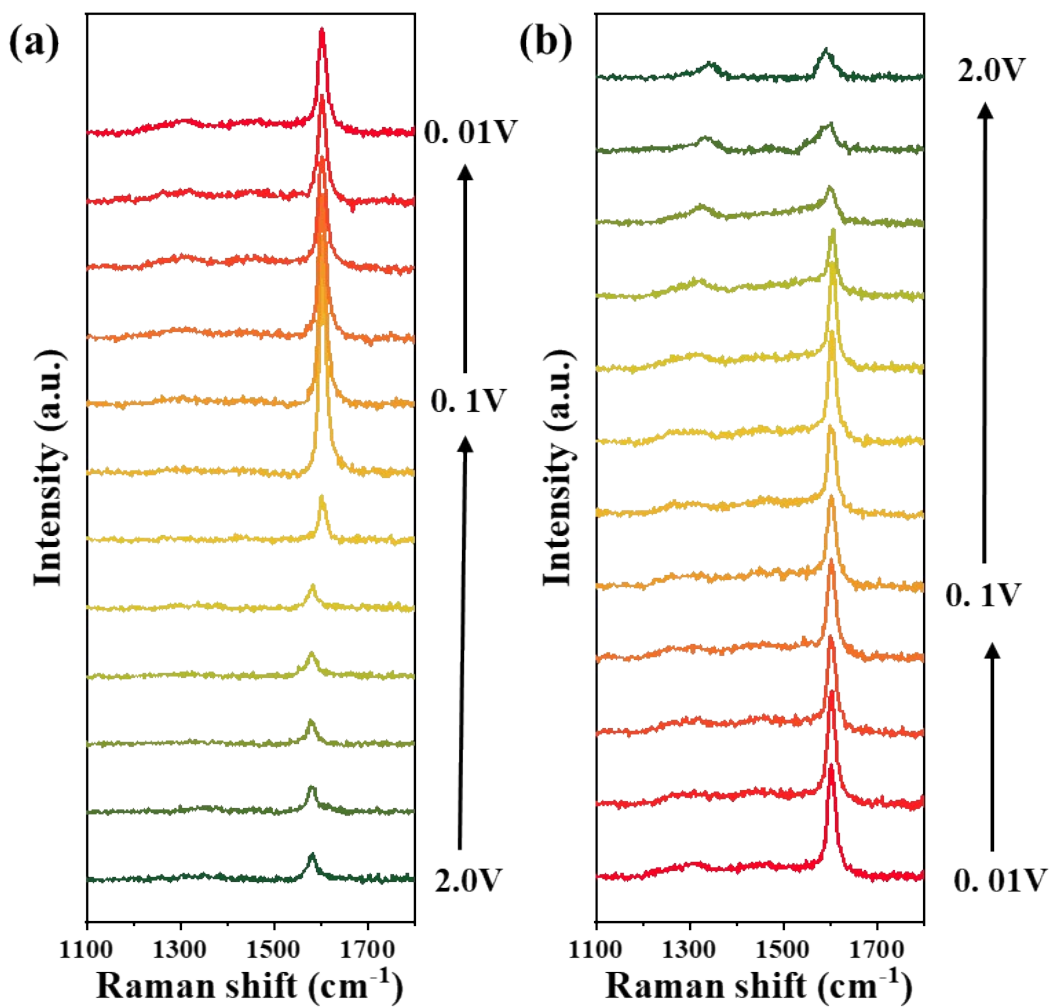

**Figure S12.** (a-b) *In-situ* Raman spectroscopy of HC-G-1 electrode at discharge from 2 V to 0.01 V, and at charge from 0.01 V to 2 V at a current density of 50  $\text{mA g}^{-1}$ .

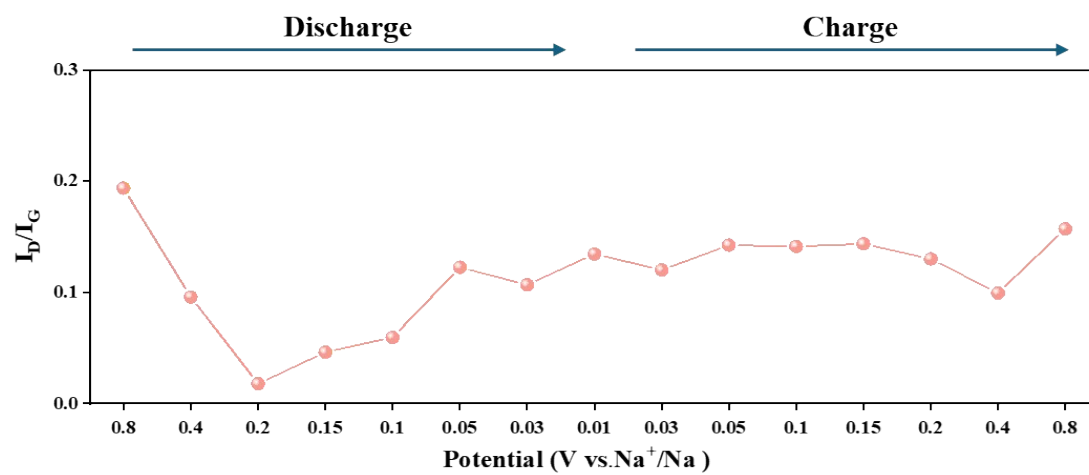

**Figure S13.** The  $I_D/I_G$  ratio at different potential during charge-discharge process of HC-G-1 electrode.



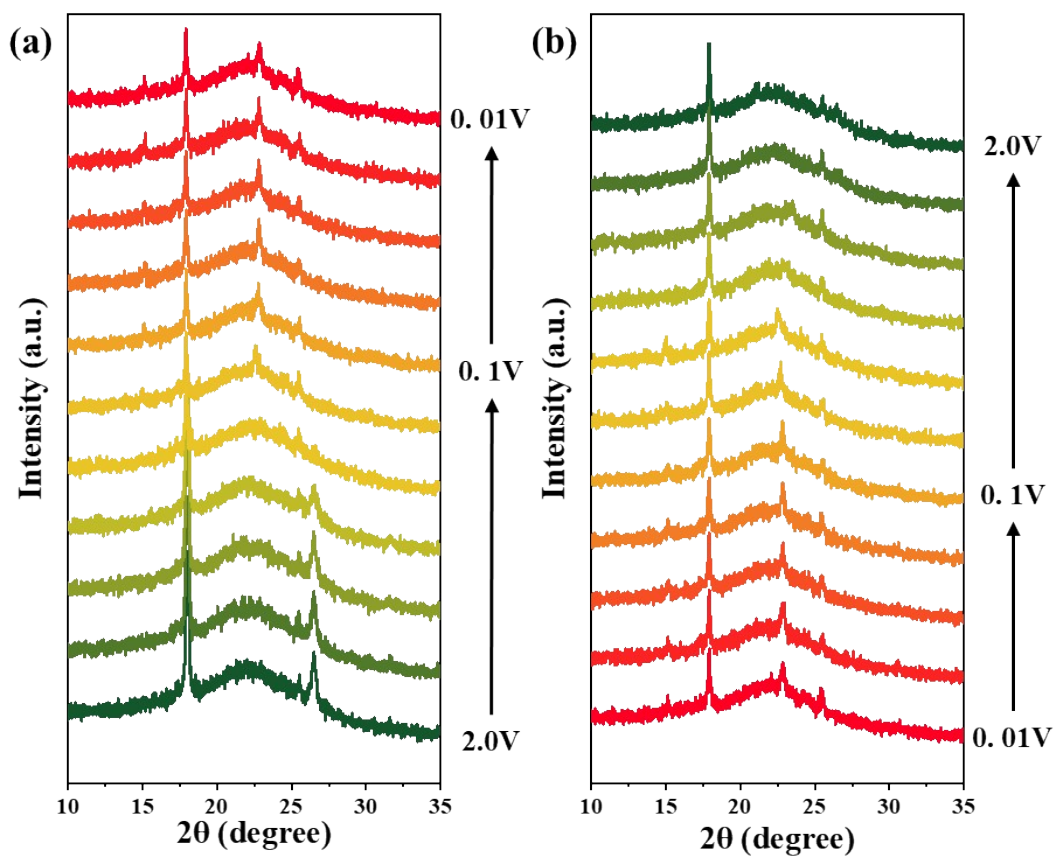

**Figure S14.** (a-b) *In-situ* XRD patterns of HC-G-1 electrode at discharge from 2 V to 0.01 V, and at charge from 0.01 V to 2 V at a current density of 50 mA g<sup>-1</sup>.

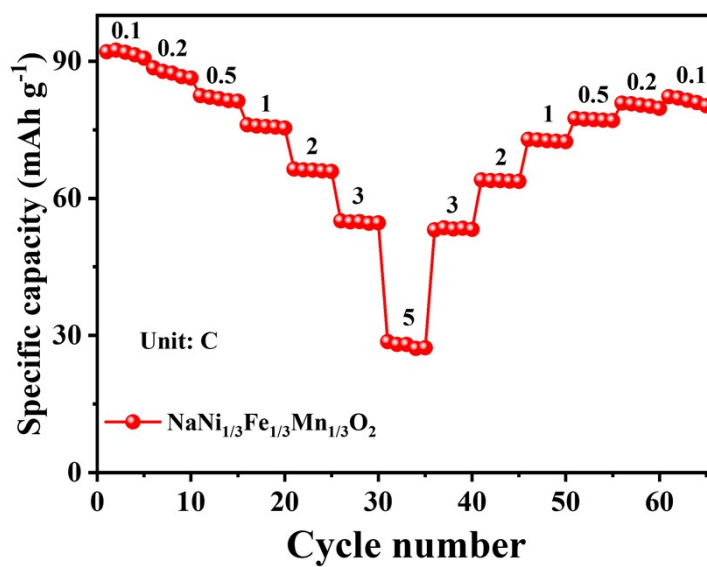

**Figure S15.** The rate performance of the  $\text{NaNi}_{1/3}\text{Fe}_{1/3}\text{Mn}_{1/3}\text{O}_2$  cathode.

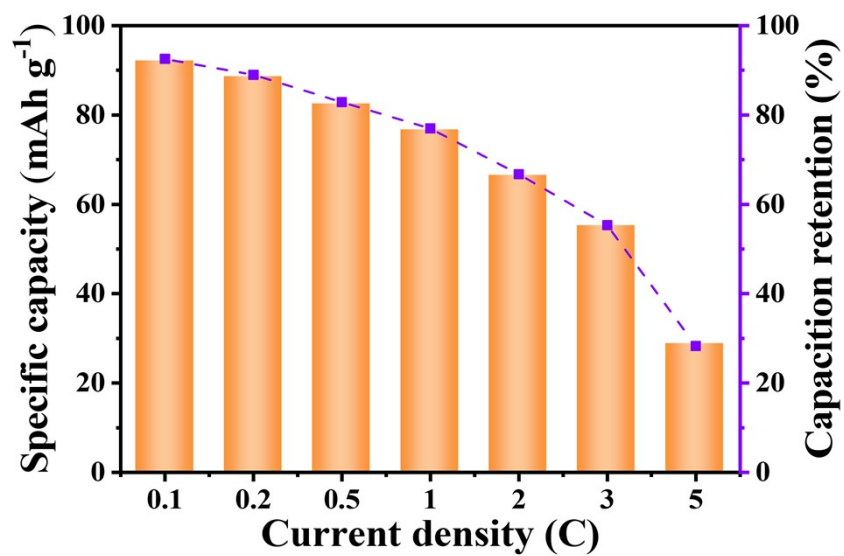

**Figure S16.** The rate performance of  $\text{NaNi}_{1/3}\text{Fe}_{1/3}\text{Mn}_{1/3}\text{O}_2//\text{HC-G-1}$  full-cell at different current densities (1 C = 300 mA g<sup>-1</sup>).

**Table S1.** The interlayer distance ( $d_{002}$ ), average crystallite width of graphitic domains ( $L_a$ ), and average thickness of graphitic domains ( $L_c$ ) from X-ray diffraction (XRD) patterns of the HC, HC-G-0.5, HC-G-1 and HC-G-2 samples.

| Samples  | $d_{002}$ (nm) | $L_a$ (nm) | $L_c$ (nm) |
|----------|----------------|------------|------------|
| HC       | 0.374          | 11.02      | 10.55      |
| HC-G-0.5 | 0.386          | 10.80      | 10.48      |
| HC-G-1   | 0.395          | 11.09      | 10.98      |
| HC-G-2   | 0.398          | 11.98      | 11.58      |

**Table S2.** Specific surface areas and pore structure calculated from N<sub>2</sub> adsorption/desorption isotherms, and true density and closed pore volume of the HC, HC-G-0.5, HC-G-1 and HC-G-2 samples.

| Samples  | Specific<br>surface area/<br>m <sup>2</sup> g <sup>-1</sup> | Total pore<br>volume/<br>cm <sup>3</sup> g <sup>-1</sup> | Average pore<br>size/<br>nm | True<br>density/<br>g cm <sup>-3</sup> | Closed pore<br>volume/<br>cm <sup>3</sup> g <sup>-1</sup> |
|----------|-------------------------------------------------------------|----------------------------------------------------------|-----------------------------|----------------------------------------|-----------------------------------------------------------|
| HC       | 1.17                                                        | 0.00808                                                  | 6.42                        | 2.13                                   | 0.0274                                                    |
| HC-G-0.5 | 3.62                                                        | 0.00116                                                  | 8.57                        | 1.97                                   | 0.0656                                                    |
| HC-G-1   | 5.88                                                        | 0.00198                                                  | 6.33                        | 1.75                                   | 0.129                                                     |
| HC-G-2   | 421                                                         | 0.13554                                                  | 1.85                        | 1.84                                   | 0.101                                                     |
